# Supplementary material for: Cryopolymerization enables anisotropic polyaniline hybrid hydrogels with superelasticity and highly deformation-tolerant electrochemical energy storage
Source: PubMed Central journal article supplement (PMC6946679; doi:10.1038/s41467-019-13959-9), 2020-01-07
Supplement: 41467_2019_13959_MOESM1_ESM.pdf [file 41467_2019_13959_MOESM1_ESM.pdf]

## Supplementary Information

Cryopolymerization enables anisotropic polyaniline hybrid hydrogels with superelasticity and highly deformation-tolerant electrochemical energy storage

Li et al.

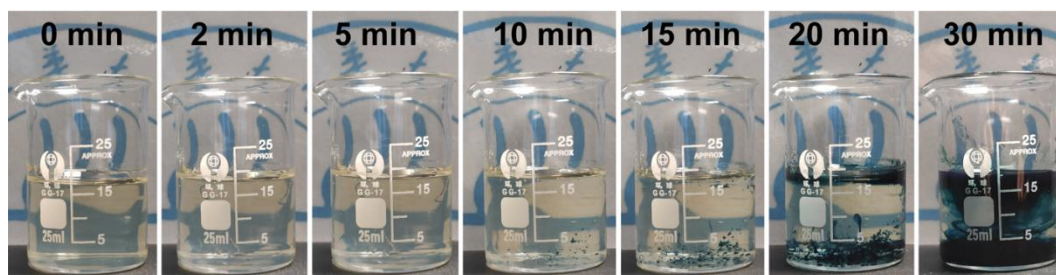

**Supplementary Figure 1.** Real-time photographs showing the color change of the precursor solution of APPH-2 at 0 °C during 0 to 30 min.

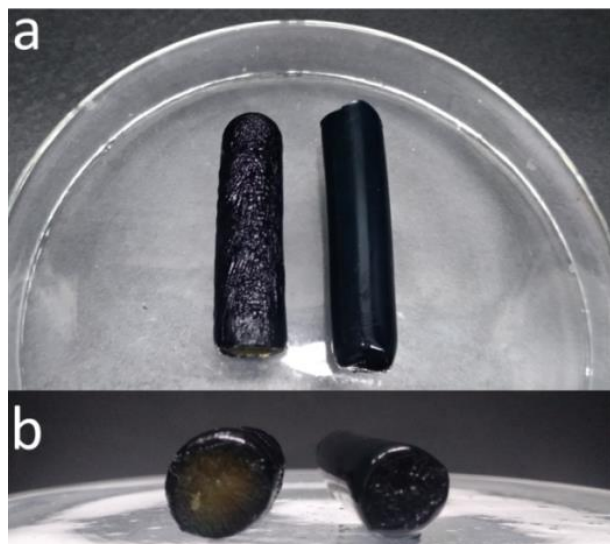

**Supplementary Figure 2.** Photographs of the CPPH (left) and APPH-2 (right) cylinders from the **a** top and **b** cross-sectional views.

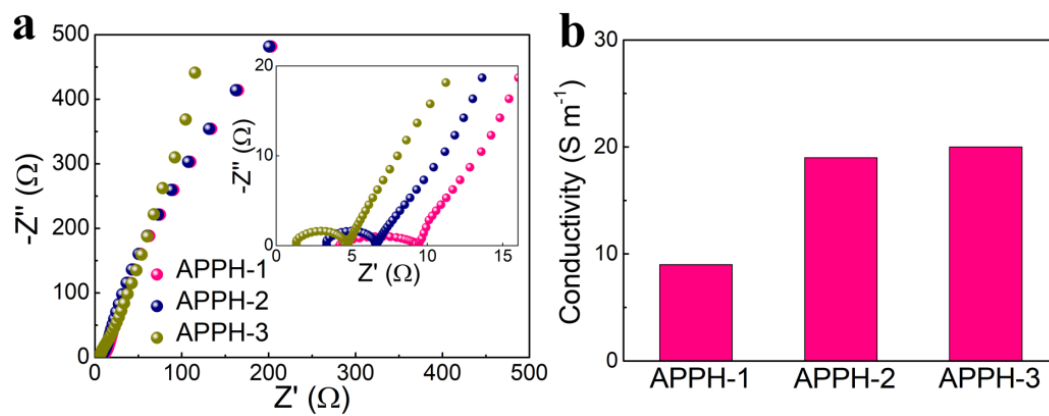

**Supplementary Figure 3.** **a** Nyquist plots of APPH-1, APPH-2 and APPH-3 electrodes, respectively. Inset of **a** shows their high-frequency regions of Nyquist plots. **b** Conductivity of APPH-1, APPH-2 and APPH-3 calculated from the EIS measurements.

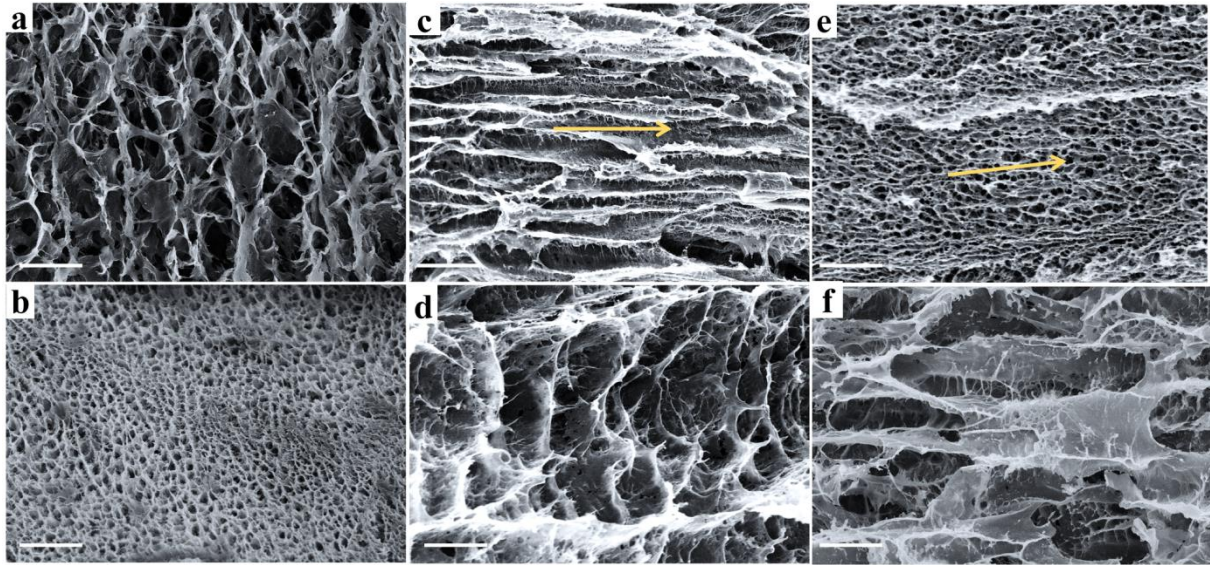

**Supplementary Figure 4.** SEM images of **a** APPH-1 and **b** APPH-3 from the view perpendicular to the  $z$ -axis. Scale bars: **a**, **b** 20  $\mu\text{m}$ , respectively. SEM images of **c**, **d** APPH-1 and **e**, **f** APPH-3 from the view parallel to the  $z$ -axis. Yellow arrows in **c**, **e** indicating the  $z$ -axis. Scale bars: **c** 20  $\mu\text{m}$ , **d** 2  $\mu\text{m}$ , **e** 20  $\mu\text{m}$ , **f** 2  $\mu\text{m}$ .

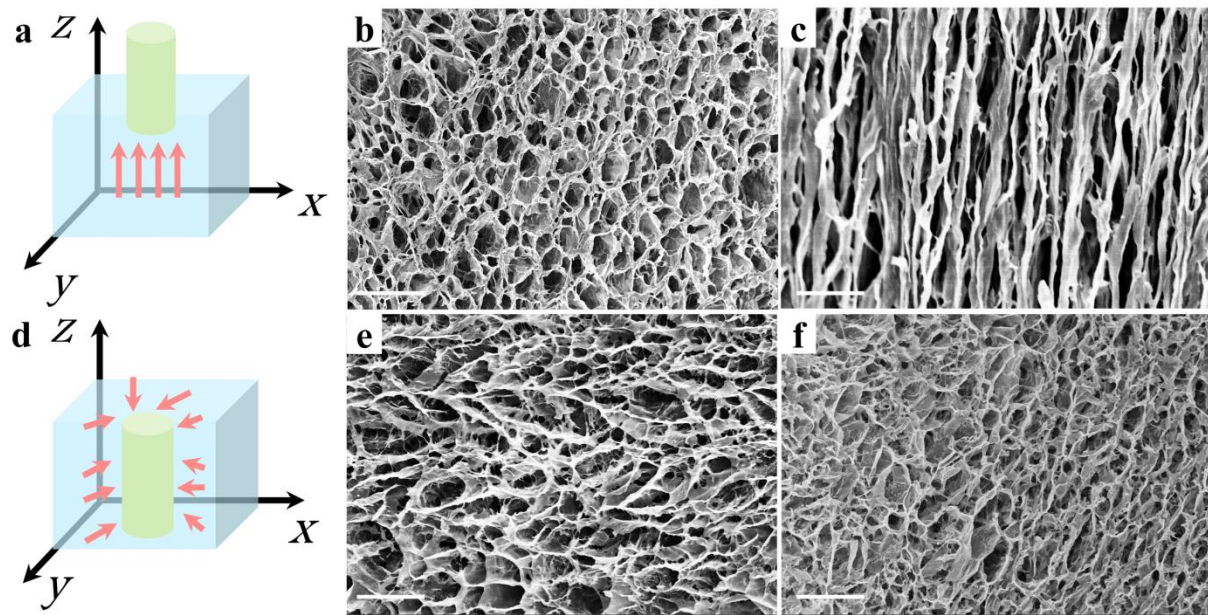

**Supplementary Figure 5.** **a** Schematic of the dipping freezing method for the PVA-AH. SEM images of the PVA-AH from the views of **b** perpendicular and **c** parallel to the  $z$ -axis. Scale bars: **b**, **c** 20  $\mu\text{m}$ , respectively. **d** Schematic of the conventional freezing method for the PVA-IH. FESEM images of the PVA-IH from the views of **e** perpendicular and **f** parallel to the  $z$ -axis. Scale bars: **e**, **f** 20  $\mu\text{m}$ , respectively.

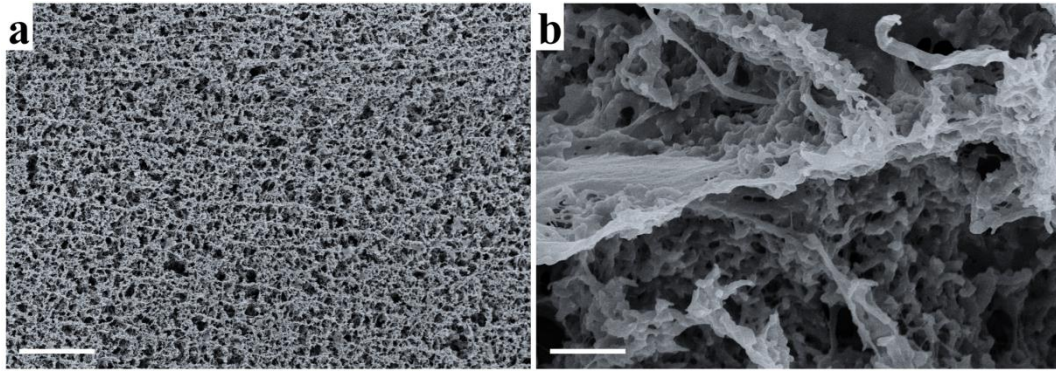

**Supplementary Figure 6.** SEM images of the APPH prepared with an initial aniline concentration of 1.0 M from the view of perpendicular to the  $z$ -axis at **a** low and **b** high magnifications, respectively. Scale bars: **a** 10  $\mu\text{m}$ , **b** 1  $\mu\text{m}$ .

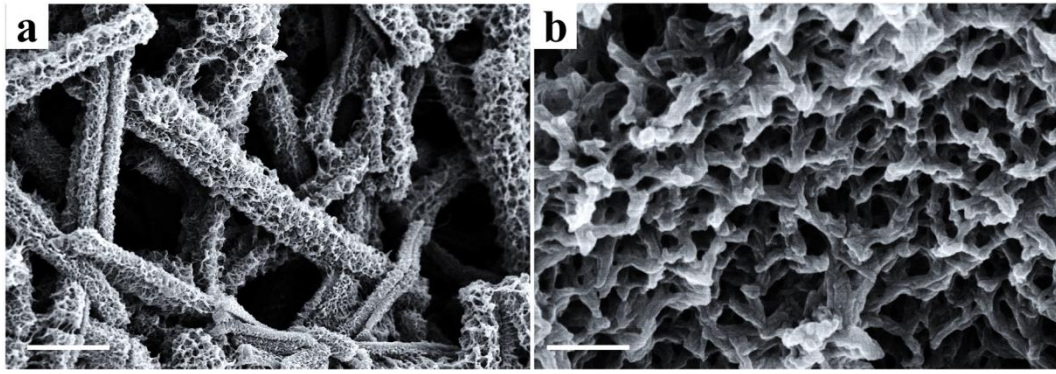

**Supplementary Figure 7.** SEM images of the PANI prepared by the cryopolymerization of neat aniline and APS without the addition of PVA at **a** low and **b** high magnifications, respectively. Scale bars: **a** 4  $\mu\text{m}$ , **b** 200 nm.



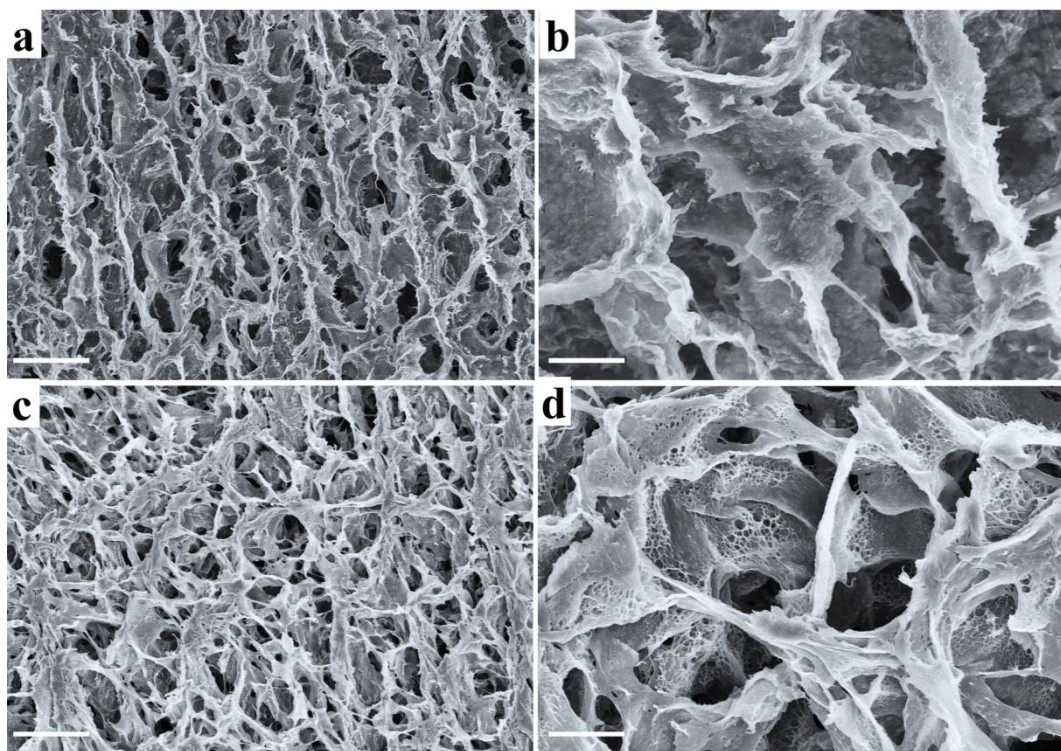

**Supplementary Figure 8.** SEM images of **a, b** CPPH and **c, d** IPPH. Scale bars: **a** 10  $\mu\text{m}$ , **b** 2  $\mu\text{m}$ , **c** 10  $\mu\text{m}$ , **d** 2  $\mu\text{m}$ .

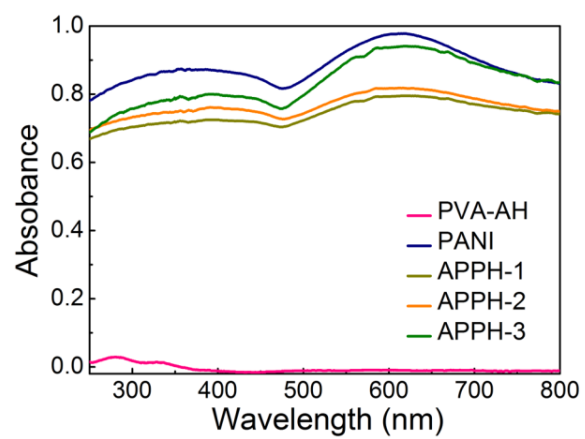

**Supplementary Figure 9.** UV-vis spectra of the PANI, PVA-AH and APPH.

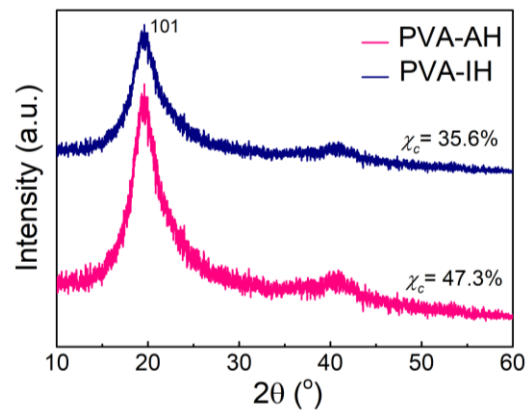

**Supplementary Figure 10.** XRD patterns of the PVA-AH and PVA-IH.

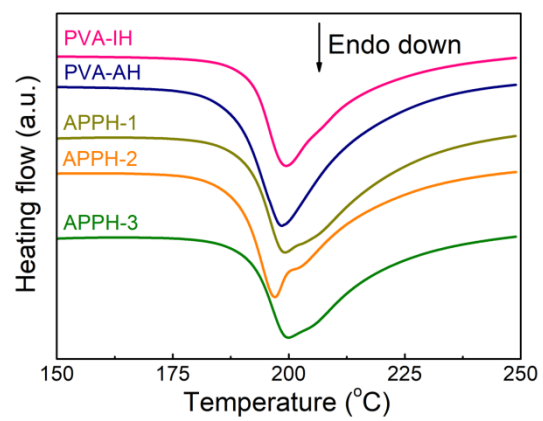

**Supplementary Figure 11.** DSC curves of the PVA-IH, PVA-AH and APPH samples.

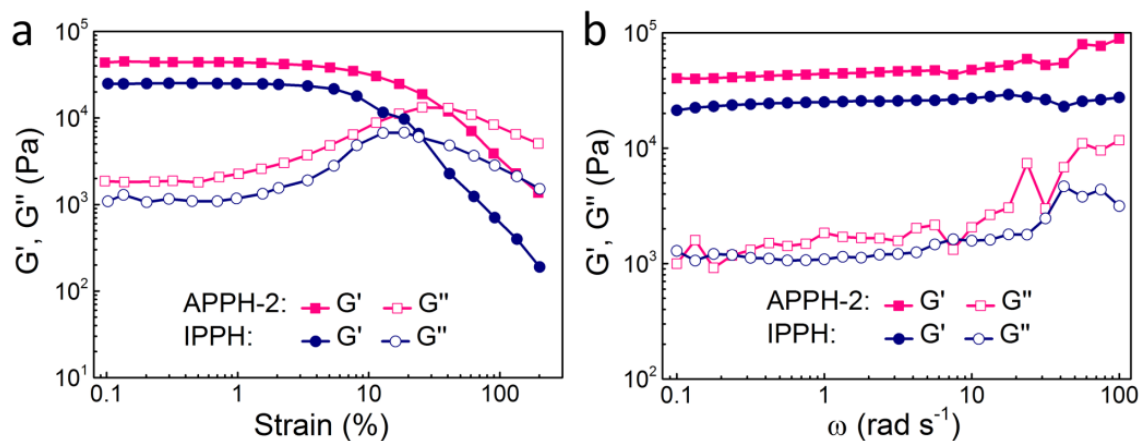

**Supplementary Figure 12.** Rheological properties of the APPH-2 and IPPH. **a** Strain sweeping measurements at a constant angular frequency of  $1 \text{ rad s}^{-1}$ . **b** Angular frequency sweeping measurement at a constant strain of 0.5%.

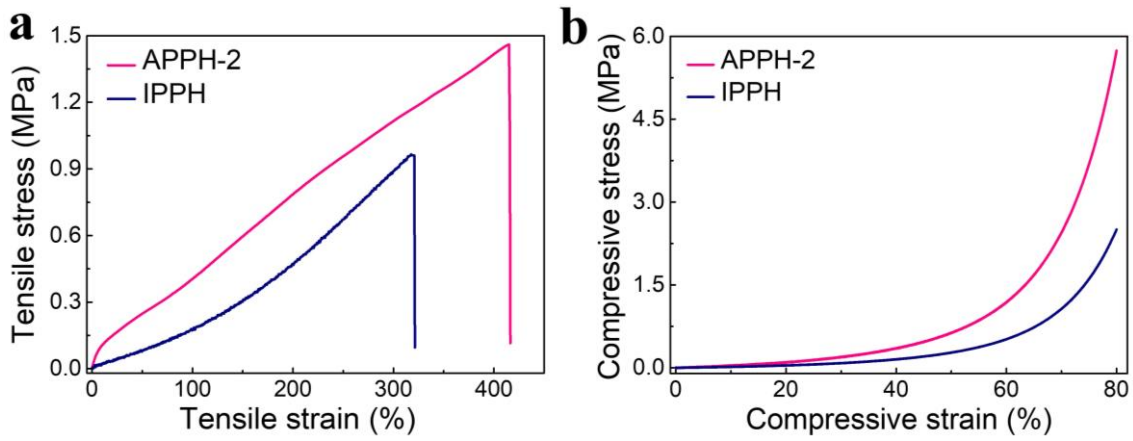

**Supplementary Figure 13. a** Typical tensile stress-strain curves of the APPH-2 and IPPH. **b** Typical compressive stress-strain curves of the APPH-2 and IPPH.

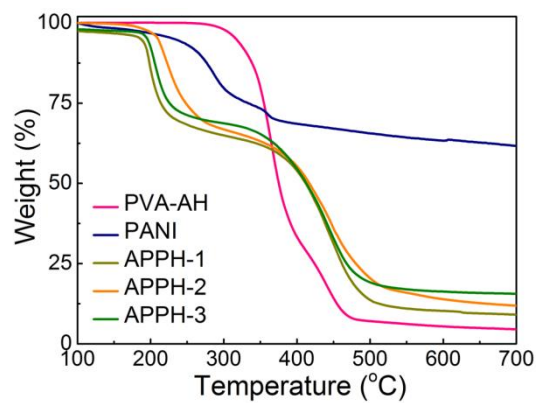

**Supplementary Figure 14.** TGA curves of the PVA-AH, PANI and APPH in a nitrogen atmosphere.

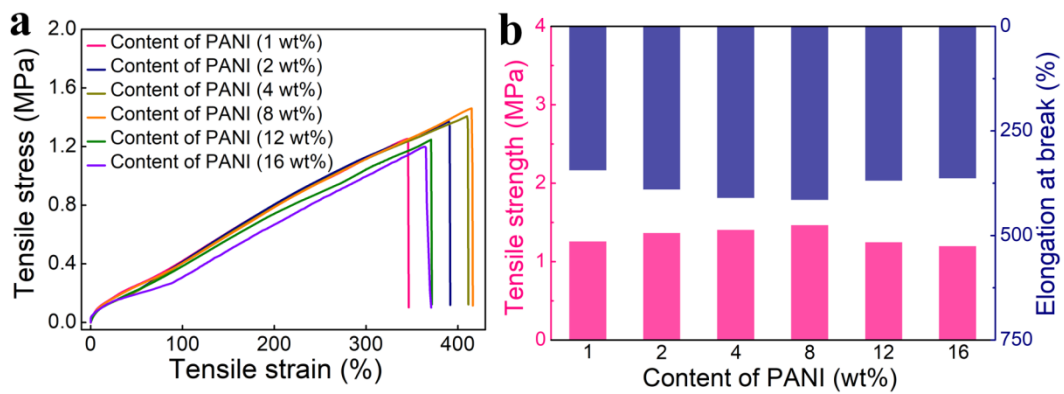

**Supplementary Figure 15.** **a** Typical tensile stress-strain curves, **b** tensile strength and elongation at break of the APPH with various contents of PANI (1, 2, 4, 8, 12, 16 wt%, respectively).



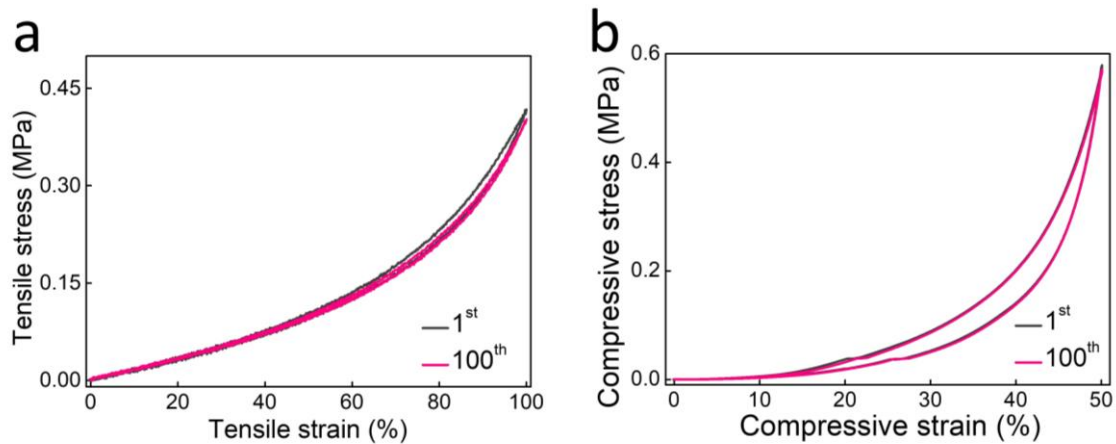

**Supplementary Figure 16. a** Hysteresis loops of the APPH-2 at 1<sup>st</sup> and 100<sup>th</sup> tensile-recovery cycles. **b** Hysteresis loops of the APPH-2 at 1<sup>st</sup> and 100<sup>th</sup> compression-recovery cycles.

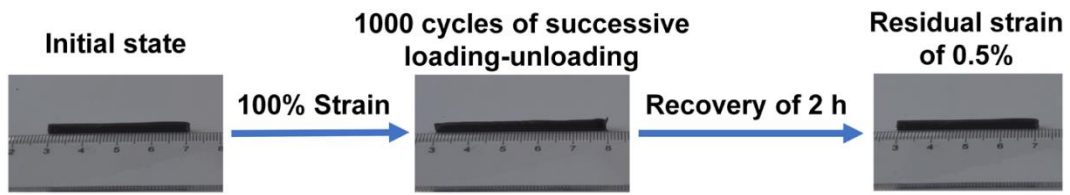

**Supplementary Figure 17.** Recovery properties of the APPH-2 after 1000 successive loading-unloading cycles at a tensile strain of 100%.

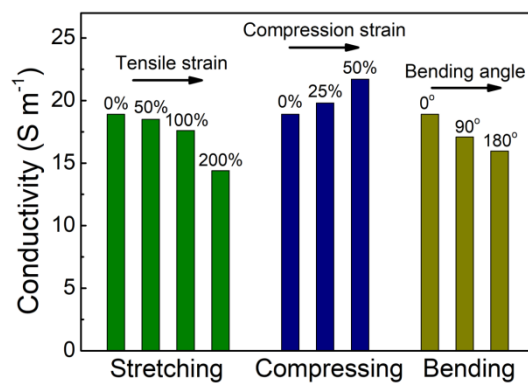

**Supplementary Figure 18.** Conductivity of the APPH-2 under the stretching (strain: from 0% to 200%), compression (strain: from 0% to 50%) and bending (angle: from 0° to 180°) states.

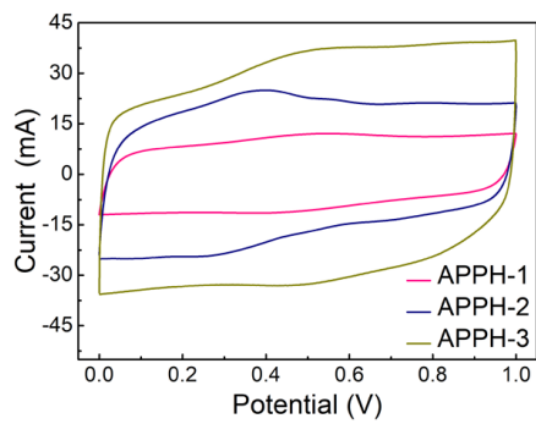

**Supplementary Figure 19.** CV curves of the A-SC using the APPH-1, APPH-2 and APPH-3 electrodes, respectively, at a scan rate of  $10 \text{ mV s}^{-1}$ .

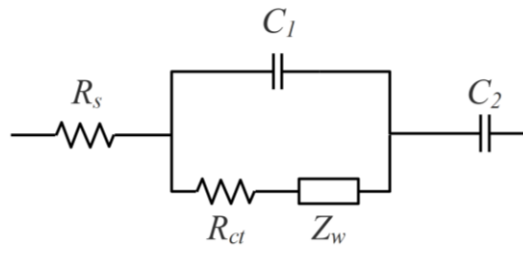

**Supplementary Figure 20.** The corresponding equivalent circuit diagram of the A-SC with the APPH-1, APPH-2 and APPH-3 electrodes.

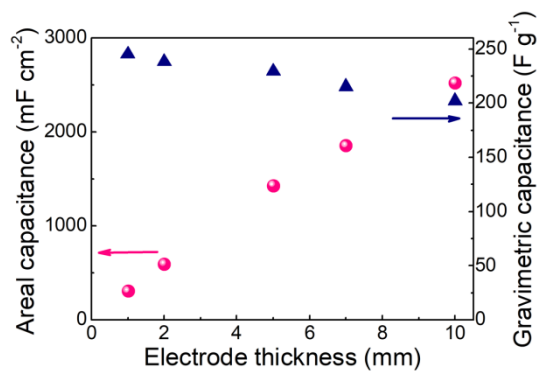

**Supplementary Figure 21.** Calculated gravimetric and areal capacitances of the A-SC using APPH-2 electrodes with various thicknesses, derived from the GCD curves at a current density of  $1 \text{ A g}^{-1}$ .

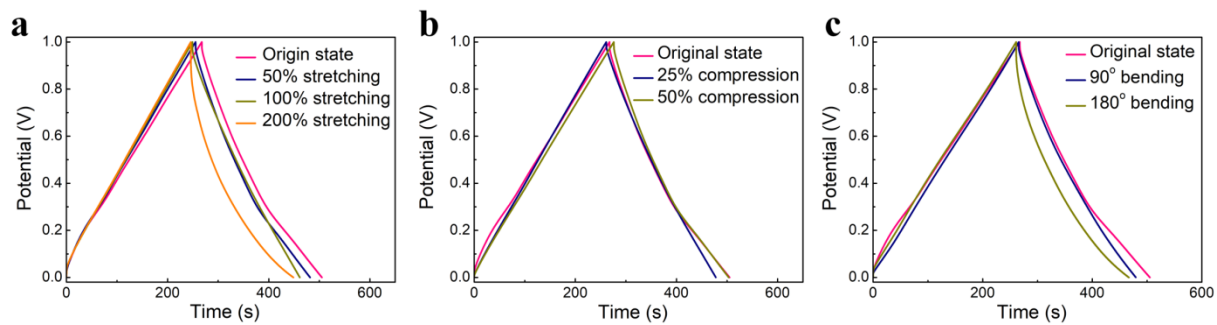

**Supplementary Figure 22.** GCD curves of the A-SC using APPH-2 electrodes under **a** stretching, **b** compression and **c** bending states at a current density of  $1 \text{ A g}^{-1}$ , respectively.

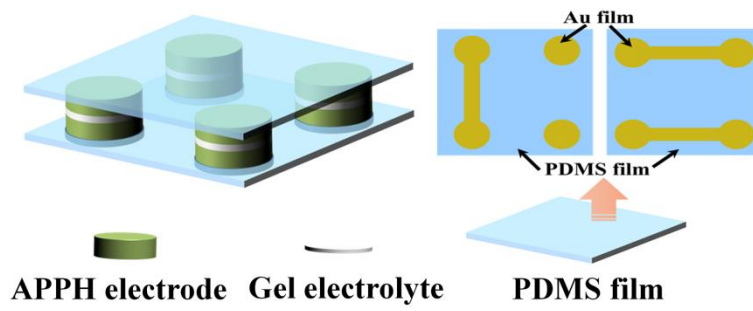

**Supplementary Figure 23.** Schematic illustration of the integration of four A-SC devices with a series connection by employing the PDMS substrates with Au film patterns as the conductive circuits.



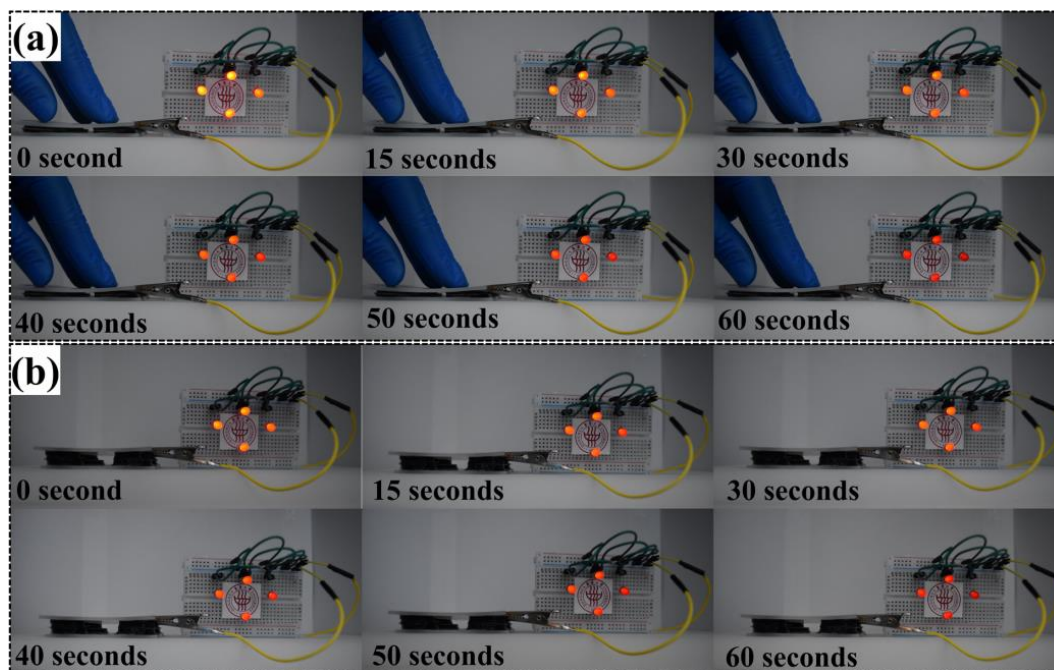

**Supplementary Figure 24.** Real-time photographs showing the integrated A-SC device using 4 series-connected A-SC with APPH-2 electrodes, which can lighten 4 LEDs from 0 to 60 s during the **a** compressing and **b** recovering.

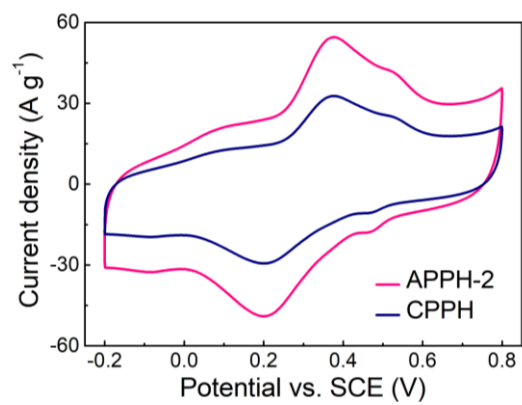

**Supplementary Figure 25.** CV curves of the A-SC using the APPH-2 and CPPH electrodes, at a scan rate of  $50 \text{ mv s}^{-1}$ .

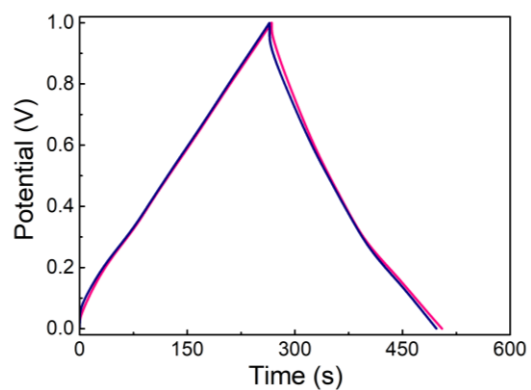

**Supplementary Figure 26.** GCD curves of the A-SC assembled with the current collectors (red curve) vertical and (blue curve) parallel to the vertically aligned pores among the APPH-2 electrodes, at a current density of  $1 \text{ A g}^{-1}$ .

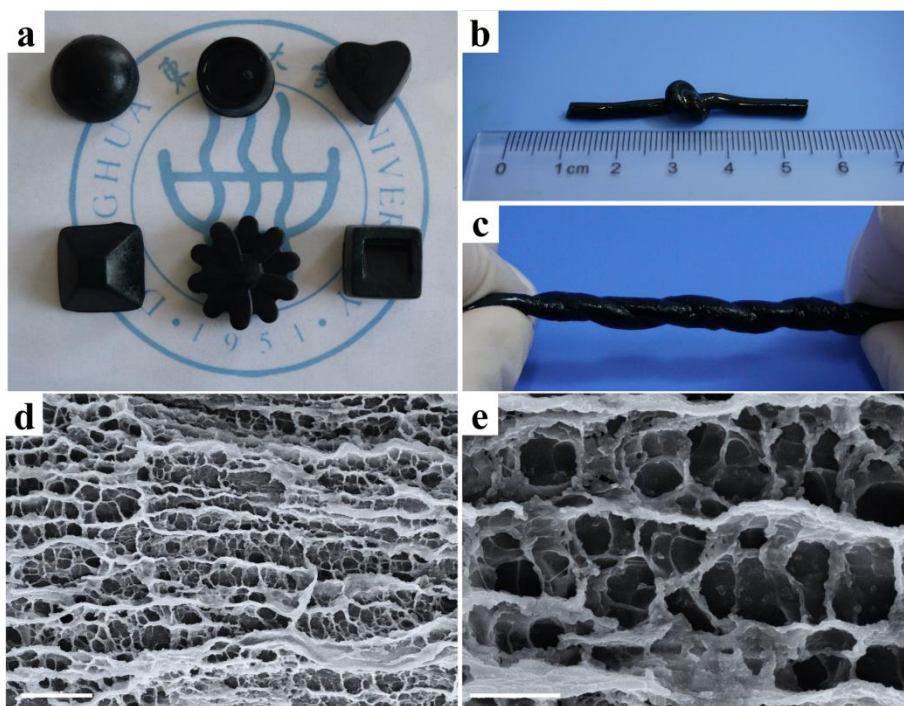

**Supplementary Figure 27.** **a** Photograph showing the diverse-shaped PVA/PPy hydrogels. Photographs showing the fiber-shaped **b** knotted and **c** twisted PVA/PPy hydrogels. **d**, **e** SEM images of the PVA/PPy hydrogels from the view parallel to the  $z$ -axis. Scale bars: **d** 4  $\mu\text{m}$ , **e** 1  $\mu\text{m}$ .

**Supplementary Table 1.** FTIR and Raman characteristic peaks in the anisotropic polyvinyl alcohol/polyaniline hydrogels.

| FTIR spectra                          |                          | Raman spectra                         |                                                |
|---------------------------------------|--------------------------|---------------------------------------|------------------------------------------------|
| Peak position<br>( $\text{cm}^{-1}$ ) | Characteristic groups    | Peak position<br>( $\text{cm}^{-1}$ ) | Characteristic groups                          |
| 1051                                  | C-O stretching vibration | 1170                                  | C-H bending                                    |
| 1294                                  | C-N stretching vibration | 1230                                  | C-N stretching (quinoid ring)                  |
| 1491                                  | Quinonoid ring vibration | 1450                                  | C-N <sup>+</sup> stretching (semiquinoid ring) |
| 1572                                  | Benzenoid ring vibration | 1600                                  | C-C deformation (semiquinoid ring)             |
| 2906                                  | C-H stretching vibration | /                                     | /                                              |
| 3224                                  | O-H stretching vibration | /                                     | /                                              |

**Supplementary Table 2.** Crystallinity ( $\chi_c$ ) and melting enthalpy ( $\Delta H_m$ ) of the polyvinyl alcohol and anisotropic polyvinyl alcohol/polyaniline hydrogels calculated from the XRD and DSC results.

| Samples | $\chi_{c1}$ (%) from XRD | $\Delta H_m$ (J g <sup>-1</sup> ) | $\chi_{c2}$ (%) from DSC |
|---------|--------------------------|-----------------------------------|--------------------------|
| PVA-IH  | 35.6                     | 77.1                              | 39.5                     |
| PVA-AH  | 47.3                     | 54.7                              | 55.6                     |
| APPH-1  | 44.6                     | 70.0                              | 50.5                     |
| APPH-2  | 42.1                     | 66.3                              | 47.8                     |
| APPH-3  | 37.2                     | 57.1                              | 41.2                     |

**Supplementary Table 3.** Elemental analysis of the freeze-dried anisotropic polyvinyl alcohol/polyaniline hydrogels.

| Samples | Synthesis condition |              | Elemental analysis |                   |            |
|---------|---------------------|--------------|--------------------|-------------------|------------|
|         | Aniline<br>(M)      | PVA<br>(wt%) | N content<br>(wt%) | C/N mass<br>ratio | PANI (wt%) |
| APPH-1  | 0.05                | 10           | 0.87               | 84.3              | 4.3        |
| APPH-2  | 0.10                | 10           | 1.56               | 44.0              | 8.4        |
| APPH-3  | 0.20                | 10           | 2.92               | 24.1              | 15.7       |

**Supplementary Table 4.** Electrochemical impedance spectroscopy data obtained from the equivalent circuit simulation of Nyquist plots in Fig. 5c by using the equivalent circuit model (Supplementary Figure 20).

| Samples | $R_s$ ( $\Omega$ ) | $C_1$ (mF) | $R_{ct}$ ( $\Omega$ ) | $C_2$ (F) | $Z_w$ ( $\Omega$ ) | Contact impedance ( $C_1/R_{ct}$ ) | RC time constant (s) |
|---------|--------------------|------------|-----------------------|-----------|--------------------|------------------------------------|----------------------|
| APPH-1  | 7.15               | 20         | 3.28                  | 0.14      | 0.20               | 6.10                               | 4.76                 |
| APPH-2  | 5.33               | 37         | 3.70                  | 0.13      | 0.20               | 10.0                               | 5.26                 |
| APPH-3  | 6.15               | 29         | 3.53                  | 0.11      | 0.23               | 8.22                               | 8.33                 |



**Supplementary Table 5.** Summary of the stretchable supercapacitors using conducting polymer-based electrodes in the literature.

| Electrode materials       | Gravimetric capacitance of supercapacitor ( $F\ g^{-1}$ ) | Cycling stability                | Mechanical performance              | Refs.     |
|---------------------------|-----------------------------------------------------------|----------------------------------|-------------------------------------|-----------|
| PANI hydrogel             | 430 at $5\ mV\ s^{-1}$                                    | 85% retention after 1000 cycles  | bendable                            | [1]       |
| PPy hydrogel              | 140 at $1\ A\ g^{-1}$                                     | 90% retention after 3000 cycles  | bendable                            | [2]       |
| PANI grafted PVA hydrogel | 153 at $1\ A\ g^{-1}$                                     | 90% retention after 1000 cycles  | bendable                            | [3]       |
| PANI-GO hydrogel          | 112 at $0.08\ A\ g^{-1}$                                  | 86% retention after 17000 cycles | bendable                            | [4]       |
| PVA-PANI hydrogel         | 210 at $0.25\ A\ g^{-1}$                                  | 107% retention after 2000 cycles | foldable                            | [5]       |
| SWCNT/PANI foam           | 216 at $0.64\ A\ g^{-1}$                                  | 92% retention after 1000 cycles  | compressible                        | [6]       |
| APPH-2                    | 260 at $0.5\ A\ g^{-1}$                                   | 90% retention after 2000 cycles  | stretchable, compressible, bendable | This work |

**Supplementary Table 6.** Electrochemical impedance spectroscopy data obtained from the equivalent circuit simulation of Nyquist plots in Fig. 6d by using the equivalent circuit model (Supplementary Figure 20).

| Sample states   | $R_s$<br>( $\Omega$ ) | $C_1$<br>(mF) | $R_{ct}$<br>( $\Omega$ ) | $C_2$<br>(F) | $Z_w$<br>( $\Omega$ ) | Contact impedance<br>( $C_1/R_{ct}$ ) | RC time<br>constant (s) |
|-----------------|-----------------------|---------------|--------------------------|--------------|-----------------------|---------------------------------------|-------------------------|
| Original        | 5.33                  | 37            | 3.70                     | 0.13         | 0.20                  | 10.0                                  | 5.26                    |
| 200% stretching | 9.74                  | 15            | 3.16                     | 0.11         | 0.24                  | 4.75                                  | 11.2                    |
| 50% compressing | 5.46                  | 33            | 2.93                     | 0.14         | 0.18                  | 11.26                                 | 4.76                    |
| 180° bending    | 9.14                  | 16            | 3.27                     | 0.11         | 0.20                  | 4.89                                  | 7.69                    |

## Supplementary References

1. Shi, Y. et al. Nanostructured conductive polypyrrole hydrogels as high-performance, flexible supercapacitor electrodes. *J. Mater. Chem. A* **2**, 6086-6091 (2014).
2. Wang, K. et al. Flexible solid-state supercapacitors based on a conducting polymer hydrogel with enhanced electrochemical performance. *J. Mater. Chem. A* **2**, 19726-19732 (2014).
3. Li, W., Gao, F., Wang, X., Zhang, N. & Ma, M. Strong and robust polyaniline-based supramolecular hydrogels for flexible supercapacitors. *Angew. Chem. Int. Ed.* **128**, 9342-9347 (2016).
4. Li, P. et al. Stretchable all-gel-state fiber-shaped supercapacitors enabled by macromolecularly interconnected 3D graphene/nanostructured conductive polymer hydrogels. *Adv. Mater.* **30**, 1800124 (2018).
5. Li, W., Lu, H., Zhang, N. & Ma, M. Enhancing the properties of conductive polymer hydrogels by freeze-thaw cycles for high-performance flexible supercapacitors. *ACS Appl. Mater. Interfaces* **9**, 20142-20149 (2017).
6. Niu, Z., Zhou, W., Chen, X., Chen, J. & Xie, S. Highly compressible and all-solid-state supercapacitors based on nanostructured composite sponge. *Adv. Mater.* **27**, 6002-6008 (2015).
